# Supplementary material for: Temporary stratification promotes large greenhouse gas emissions in a shallow eutrophic lake
Source: Copernicus journal article supplement (doi:10.5194/bg-2023-43), 2023-02-23
Supplement: Supplementary file [file bg-2023-43-AC1-supplement.pdf]

**Reviewer 1 comments for Preprint bg-2023-43 'Temporary stratification promotes large greenhouse gas emissions in a shallow eutrophic lake'**

Reply: General comments : we are grateful to the reviewers for their thoughtful comments and general enthusiasm for the work. But also for more critical comments which we think have improved the quality of the work substantially. We have addressed each point in turn in the following document.

*Overall comments*

In this study, greenhouse gas (GHG) samples were taken over a 6-month period from a shallow lake in Denmark with the aim of understanding stratification and mixing effects on GHG fluxes. The paper provides an interesting data set, with surface and bottom water GHG concentrations resolved in addition to ebullitive fluxes. The identification of turnover as a highly transient event that can contribute significantly to lake GHG budgets is an important finding.

The paper is well written, the figures are clear and the discussion provides a succinct description of the findings. I have two main points for the author to review, and also provide some minor editorial comments.

The key question of this study was to understand how ebullitive and diffusive fluxes of the key GHGs: CH<sub>4</sub>, CO<sub>2</sub> and N<sub>2</sub>O respond to temporary thermal stratification. However, N<sub>2</sub>O is not mentioned in the discussion in this paper and I therefore do not feel that the question has been adequately addressed. How important was N<sub>2</sub>O in the overall lake budgets, and were accompanying nutrient data able to help understand nitrification/denitrification pathways that might result in flux changes through stratification and mixing?

Reply : Some text on N<sub>2</sub>O was added to the discussion clarifying the very small role it has in GHG dynamics in the lake and that the emissions patterns are not strongly related to the stratification.

I also felt that the discussion was heavily weighted towards CH<sub>4</sub> though the key question concerns all major GHGs. I would have expected that CO<sub>2</sub> undersaturation might have been detected via headspace sampling at times of high algal productivity, as has been observed in shallow lakes in the tropics (e.g. Borges et al. 2022) and that this would mean the lake is a CO<sub>2</sub> sink at some points. That this did not occur is of interest.

Reply: The CO<sub>2</sub> dynamics are discussed a little more and periods of influx highlighted.

It is also important to note that in lakes with pH > 7.5 there is a need to further correct headspace derived CO<sub>2</sub> data, as outlined in Koschorreck et al. 2021, to account for chemical equilibration of the carbonate system.

Reply: The Koschorreck et al. 2021 correction was applied to the data and there were periods where the % error in estimation of dissolved concentration was large (more than 40%). The absolute difference was not very significant, but there was a small increase the periods of influx a little and the relevant figures (4, 6 and 8 ) have been changed.

The discussion does not place the fluxes reported in this study in a wider context with the exception of a brief comparison of mean CH<sub>4</sub> fluxes to a global study by Rosenterer et al. (2021). I therefore found it difficult to understand how important or significant the fluxes were from this lake. I think there should be more explicit comparison across all three GHGs with comparative studies from both equivalent climate zones and in a global context.

The fluxes are now placed in a wider context by comparison with other work from similar climates.

*Minor comments* Line 27-28

Missing 'for' – change to “also the need for high frequency measurements of GHG emission in 28 order to accurately characterise emissions from temporarily stratifying lakes.”

Reply: done

Line 35

Should this be 'Freshwaters'?

Reply: Fresh waters is two words as a noun, one as an adjective

Line 55

'Identity' is a bit odd in this context

Sentence changed

Line 72-74

Add reference here

Reply: done

Line 119

Sampling duration not clear. State start and end point of sampling.

Reply: It is a bit confusing, so I have clarified each section

Line 120

Measurement according to 'Danish standard procedures' doesn't mean much for international readers. A brief additional explanation would be beneficial.

Reply: done

Line 128

Did water level changes influence the relative distance between the surface and bottom water sampling points over the sampling duration?

Reply: a little but the relative distance from the lake bed of the bottom samples was consistent. When water levels were lower the relative distance between top and bottom samples would have been less, but

water level did not change so much as it was wet summer.

Lines 191-203

This seems like material for discussion rather than methods as it critiques the method applied rather than describes it objectively. I have expanded this section and would be happy to place it in the discussion or even as a supplement.

Lines 212-213

The GWPs cited come from two separate IPCC reports. The latest report, AR5 (though AR6 is due imminently...), states the 100 yr time horizon GWPs for

methane and nitrous oxide as 28 and 265 respectively. Suggest using these for consistency. Done, thanks.

Line 230

Remove interpretation from results 'likely limited by nitrogen (Søndergaard et al., 2023)'  
ok

Line 231

Change to 'mixing event'  
done

Line 240

Change to 'coincident'  
done

Line 294

Remove 'massive'  
done

Line 302

Remove more from 'more lake-wide driver'  
done

Line 306-307

This sentence is confusing. Do you mean: '6 Thus, whilst we do not have direct evidence it seems more likely that these increased emissions in the littoral zone were driven at least in part by the partial, wind-driven mixing of the GHG rich bottom waters.'?  
Yes thanks!

Line 318

The Wik et al (2013) study was focussed on Arctic lakes and found a seasonal shift in contribution of ebullition to total methane flux whereby the dominance of shallow zone bubble CH<sub>4</sub> fluxes decreased over summer relative to an increase in intermediate and deep zone fluxes. This suggests a strong temperature control. Perhaps a caveat could be added to this comparison for clarity.

done

Lines 327-335

Agree, and important to state, but equally weekly headspace sampling has some of the same issues whereby GHG fluxes resulting from highly dynamic mixing/stratification processes may not be adequately resolved. I see this caveat has been added later in the discussion (lines 400-401).

I suggest adding in that eddy covariance flux measurements are a way to achieve high temporal resolution data to characterise these processes, including the turnover flux that is described as occurring over just a few hours (e.g. Erkkilä et al. 2018; Podgrajsek et al. 2014).

done

Lines 382-384

Nutrient enriched sediments would likely provide a stable source of organic matter as redox conditions promote internal loading from sediments.

agree

Table 1

Add standard deviations and how many observations (n) informed the mean.

done

Figure 1

Where is the Aqua troll located?

0.5 m depth

Figures 3-5

Suggest merging into one figure with multiple panels

Can do – we leave them as 3 now and if accepted the editor can decide which is better.

Figure 7

I am not sure this works as a line plot. Perhaps just plot the data as points, otherwise huge step changes in ebullition fluxes are implied.

We thought about this a lot and had it as points before, but the data are the mean ebullition of the previous 14 days – so the line plot is the most accurate way of presenting it.
