# Supplementary material for: Temporary stratification promotes large greenhouse gas emissions in a shallow eutrophic lake
Source: Copernicus journal article supplement (doi:10.5194/bg-2023-43), 2023-02-23
Supplement: Supplementary file [file bg-2023-43-AC2-supplement.pdf]

## Reviewer 2 comments for Preprint bg-2023-43 'Temporary stratification promotes large greenhouse gas emissions in a shallow eutrophic lake'

### Overall

This work presents data on greenhouse gas concentrations and estimated fluxes, along with temperature, oxygen, and chlorophyll data, from a eutrophic shallow lake over one season (April / May – October 2020). The topic is timely as the scientific community is working to reduce uncertainty around aquatic greenhouse gas emission estimates, especially from shallow systems. While I found the research interesting, I have a few overarching concerns:

1. The greenhouse gas data have been previously published (Søndergaard et al. 2023), which already describes the novel results of this paper: that temporary stratification events lead to the buildup of greenhouse gases, which are likely released upon turnover. I think the authors can more clearly describe how this work is different from the previously published paper-- I suspect the new addition is that this paper estimates the ebullitive and turnover fluxes, which I address next.

Re. A limited amount of data (some weeks of concentration data) was published in the Søndergaard et al. 2023, which is a summary of the different types of lake ecosystem responses to stratification – covering fish behavior, nutrient dynamics, algal biomass. The current MS is focused in on the GHG dynamics over a longer period and includes the estimates of different flux types. We think it is clear this this work is sufficiently different from that reported in Søndergaard et al. 2023 to stand alone.

2. Ebullitive fluxes were measured using floating chambers. I have not seen chambers used to estimate ebullitive fluxes before, unless the chambers were set for a short amount of time and concentrations were measured repeatedly (e.g., using a portable gas analyzer or manual sampling)—I've seen this done up to 24 hours. Then over that short amount of time, the diffusive and ebullitive fluxes are teased apart. In the current study, the chambers were deployed for 2 weeks at a time, during which the chambers would have equilibrated with the water, with the exception for bubbles. I do not think it is possible to determine the total amount of ebullition with this approach. For instance, if a bubble occurred on Day 1, the CH<sub>4</sub> could diffuse back into the water column by the time the chambers were checked two weeks later. While I am empathetic to the challenges of measuring ebullition, I do not agree with the authors that this is the “least worst method available.”

Reply: This is a very relevant point and something we have given a lot of thought. We have added a section entitled to the methods discussion the static chambers to estimate ebullition. This can be moved to supplementary materials as a stand alone section 'on the use of static chambers to estimate ebullition' if it is more appropriate. As the reviewer states the method is imperfect in two main ways

1. there is constant diffusion of CH<sub>4</sub> into the chamber to an equilibrium value which will be reached over the time of deployment:
2. We do not know when the bubbles arrive in the chamber and in the worse case if a bubble arrives on day 1 then there is time for the high concentrations in the bubble to diffuse back into the water.

We have attempted to tackle this uncertainty in two ways: 1) To establish evidence of ebullition we used the dissolved concentration of the CH<sub>4</sub> on the day sampling and calculated the theoretical concentration of CH<sub>4</sub> in the chamber at equilibrium with the dissolved concentration. If the CH<sub>4</sub> of ppm in the chamber was lower or close (<10 ppm) to the theoretical values we ascribe an ebullition a value of zero to the chamber. If the value was higher this is evidence that ebullition had occurred over the two week period. There is then a choice as to whether: 1) use this corrected value to estimate ebullition, or 2) use the value measured in the chamber without correction. We chose to not correct these values. The rationale being that once ebullition has occurred the CH<sub>4</sub> concentration in the chambers is higher than in the water and so any diffusion taking place will be from the chamber to the water. As the ebullition estimated by the static chambers is already highly likely to be an underestimate it does not seem wise to increase the underestimate by correcting for the diffusive flux.

In addition, we took new measurements from static chambers as done for this study and compared the results with an automatic flushing chamber (AFC) which was placed alongside the static chamber. The AFC is an adaptation of the chambers developed by Bastviken et al ((Bastviken et al., 2020; Duc et al., 2013) where the same low cost sensors as applied by Bastviken et al. 2020 (Figaro TGS 261 E00) and an infra- red CO<sub>2</sub> (Sensiron SCD30) measuring at high frequency (every few seconds). The chambers have a fan based flushing system which ran every four hours. This allows ebullitive and diffusive flux to be calculated 6 times a day. The total flux is estimated from the concentration measured just prior to the chamber flushing after four hours of diffusive and ebullitive accumulation. In order to separate ebullition from diffusive flux we used an iterative process where 120 five minutes periods were randomly sampled over the four hours between flushes. Linear regression of change in CH<sub>4</sub> concentration against time was conducted on these 300 five minute periods and the median beta of the regression used as the estimate of diffusive flux. This iterative process obviates the effects of any bubbles which can arrive in these five minute periods used to estimate diffusive flux. A bubble arriving in the chamber in these five minutes period would result in a low  $r^2$  of the resultant regression. Tests show that the  $r^2$  and beta of the regression stabilize after around 120 iterations but 150 was chosen so to ensure that even in periods of frequent ebullition the

diffusive flux could be reliably estimated. Once diffusive flux was reliably estimated for each period then it was possible to disentangle diffusive and ebullitive flux for each four hour period.

The comparison of the two methods took place in June and July 2023 the results of the AFC gave daily estimates of CH<sub>4</sub> ebullition from which an average estimate of ebullition for the sampling period was derived. These averages were for the sampling period ending on the 10/07/2023 were 33.3 mg CH<sub>4</sub>-C m<sup>-2</sup> d<sup>-1</sup> and for the period ending 18/07/2023 was 91.2 CH<sub>4</sub>-C m<sup>-2</sup> d<sup>-1</sup>. The estimate from the static chamber which the AFC was placed next to was 27.9 mg CH<sub>4</sub>-C m<sup>-2</sup> d<sup>-1</sup> and 59.9 mg CH<sub>4</sub>-C m<sup>-2</sup> d<sup>-1</sup> which were underestimates of 5.4 and 31.3 mg CH<sub>4</sub>-C m<sup>-2</sup> d<sup>-1</sup>, which represents a 16 and 31 % underestimate.

31% is a relatively large error and this may have been higher in the second testing phase as the highest ebullitive fluxes arrived on the first day of the period. Therefore 30% may be a maximum error. When these results are compared with the error in the estimate of using a single day's observation (supp material 2 and 3) to characterize ebullitive flux which had an error of 4-111% error and a median error of 50% even an error of 31% is relatively low. In summary we can be sure that static chambers are an underestimate of ebullition but they provide a feasible means of continuous data collection which the results show have greater merit than the deployment of 'better' methods for shorter periods of time.

3. Turnover fluxes assume that all the CO<sub>2</sub> and CH<sub>4</sub> gases in the hypolimnion were released when the lake mixed. This approach assumes that there was no CH<sub>4</sub> oxidation during turnover, which contrasts previous studies (see Kankaala et al. 2007, Thottathil et al. 2019, Zimmerman et al. 2021). If the lake mixes rapidly, oxidation may be low; however, previously published data on this lake from the same year (Søndergaard et al. 2023) shows that while thermal mixing can occur within hours, it can take 5 days for the complete mixing of oxygen. As thermoclines and oxyclines are offset in this lake (and this may be a common phenomenon, e.g. Gray et al. 2020), I don't think it's fair to assume oxidation is 0. Therefore, without oxidation estimates, these turnover values may be huge overestimates.

Another good point, our calculation of turnover flux is simplistic as we assumed that all the methane in the hypolimnion was released, whereas a portion of it would be oxidized. To address this we measured CH<sub>4</sub> oxidation rates in the surface waters of the lake and we have used these values to estimate the amount of CH<sub>4</sub> oxidised during turnover. Whilst the mixing of the lake started on 30<sup>th</sup> of June the bottom water was not oxic until four days later. We used a minimum, mean and maximum oxidation rates measured to correct the estimate of overturn flux. Details are given in the methods. The estimated overturn flux was reduced, but only by between 2 and 8% the estimate by the amount of CH<sub>4</sub> that would have been oxidized over the 4 days the lake took to fully mix. The mean CH<sub>4</sub> oxidation rates were used to correct the turnover flux estimates.

## Specific Comments

### Abstract

- Lines 18-19: provide details of length of the study (e.g., May to October for GHGs)

\*done

### Introduction

- Broad framework of the Introduction is focused on climate change, but this is not a climate change study. While climate change will likely change the mixing regimes of lakes and ponds, it is not the major focus of this study. The novelty of this study seems to be that intermittently mixing lakes have unique biogeochemical cycles, and the oxic-anoxic cycles may explain the variability in fluxes over time. The challenge is that this story is also the framework for the Søndergaard et al. 2023 paper, which used the same dataset.

Reply: It is true this is not explicitly a climate change study, but as one of the effects of climate change will be more frequent heat waves and periods of lake stratification so we think that the introduction is appropriate. The intermittent mixing and its effects is indeed the focus and the comparison of the dynamics of the stratified versus the mixed phase is indeed the focus. A very small part of this dataset – concerning bottom and surface water concentrations of the GHGs before and after the mixing event at the end of June were in the Søndergaard et al 2023. We think that the current work is a standalone paper.

- Line 40: Provide more details on the % contribution coming from lakes and ponds instead of saying “large proportion”

Reply: Altered to over half – as in the paper

- Line 53: See Deemer and Holgerson 2021 on the drivers of diffusive and ebullitive fluxes

Reply: Ref added

- Lines 62-66: See Holgerson et al. 2022, which describes mixing regimes in shallow waterbodies including this category of intermittent or temporary stratification.

included

- Lines 71-73: The discussion of C burial is interesting but a bit of a red herring as it is not something addressed in this paper

True we do not at all address it, it was included as it was part of the study cited here as such we keep it for now.

- Lines 76-77: How is this specific to shallow lakes?

Good question! Have changed the way this part is written, I hope it is clearer

## Methods

- Lines 90-98: Provide overview of the study time start and end in the first few paragraphs—the whole season study is a major strength of this study.

done

- Line 99: Was a solar shield used for measuring air temperature?

yes

- Lines 113-116: Stratification should be defined by density **instead** of temperature because the density-temperature relationship is not linear, and water density is what determines stratification. See Gray et al. 2020 for more details on the importance of using density over temperature. Especially considering this study includes measurements from May – October, the temperature range is large and the density-temperature relationship becomes more important

The reviewer is correct that using density is better than temperature but here we define periods as either stratified or mixed on the stated criteria and we think this is sufficiently robust for this study.

- Lines 113-116: I find it confusing to determine stratification periods by both temperature and oxygen considering the thermocline and the oxycline set up at different time scales (e.g., Søndergaard et al. 2023). I recommend just using density differences.

As above

- Lines 115-116: The statement that bottom waters remain undisturbed is an assumption—partial mixing events likely increase turbulence at the surface of the hypolimnion and gases can be exchanged.

True – statement is caveated

- Lines 148-151: How far away was windspeed measured? Were the on-lake conditions compared to the institute's measurements?

Wind data comes from the Danish meteorological institute which provides modelled wind speed for 20km<sup>2</sup> grid squares

- Lines 168-170: Why is oxygen used to determine the hypolimnion here, whereas mixing was previously defined based on temperature and oxygen?

We used the zero oxygen level to define the volume of the hypolimnion here based on the many profile data in order to calculate the volume of water that is likely to have the concentration of CH<sub>4</sub> measured in the bottom waters. Using the oxygen concentration provides a more conservative estimate than combining temp and oxygen

- Lines 170-171: As described above, I do not think the authors should assume oxidation is 0 when it may take 5 days for oxygen concentrations to equilibrate following isothermal conditions.

See above

- Lines 177-178: Floating chambers need further description (surface area, volume).

Done in methods

- Lines 177-188: See above concerns about estimating ebullition from chambers deployed for two weeks.'

addressed

- Lines 201-203: I appreciate the caveats associated with the floating chambers, but as described above, I need more convincing that these methods are appropriate. Why not measure volume displaced and collect fresh bubbles? How do the methane concentrations in the chambers compare to fresh bubbles?

There are a few other options and the floating chambers underestimate flux but we have provided evidence that they can provide useful information

Results

- Lines 218-219: Use more quantitative descriptions of time mixed vs. stratified. If you use the definition for mixed vs. stratified described in the methods (see critique on not using density), this will allow for quantifying mixed vs. stratified periods for broad summary.

See previous comment

- Figure 2: I recommend using the same gray backgrounds to show periods of thermal mixing—this will help highlight the offset between isothermal conditions and oxygen.

Coming if accepted

- Please use statistical tests and present the results on concentrations during mixed vs. stratified periods; e.g., lines 246-248.

Done for fluxes in table 2-..

- Table 1: This appears to be right from Søndergaard et al. 2023. I recommend removing it and describing in the Methods, or providing standard error or standard deviation for the 2020 season. TN:TP would be more helpful in its molar ratio to examine nutrient limitation.

Ok- SD and n provided as above

- Table 2: Statistical comparisons needed to compare mixed vs. stratified periods

done

- Figure 3: Add where the bottom samples were taken from—Station 3?

Done – yes as the deepest point –station 3

- Figure 9: Make sure the arrows match statistical differences observed.

## Discussion

- Line 294: provide number instead of saying “massive”

Removed – the other reviewer did not like it either

- Lines 295-297: provide statistical comparisons

As above

- Lines 306-308: The partial mixing here contrasts the assumption in the introduction that bottom waters were not affected by partial mixing events

Earlier statement changed

- Lines 330-335: As described above, I still need convincing that the floating chamber method is appropriate to estimate ebullition.

Already attempted

- Line 345: Explain why it's an overestimate (i.e., oxidation)

It is corrected for now

- I think subheadings could help organize the discussion
  
- The conclusion doesn't tie back to the introduction framework focused on climate change, which again suggests that the Introduction should instead focus on variable mixing regimes in shallow lakes and the consequences for biogeochemical cycling.

Good point, we have added a sentence on the possible climate change effects

#### Minor Comments Not Requiring Response

- Line 27: add "for" between "need high"

done

- Line 48: add comma after "approach"

done

- Line 434: remove "crack" as in English, it often references cocaine, which I do not think is the intent here.

It is more informal English for 'expert' and was an attempt at humour... but I can change it to avoid the drug connotations.

**Citation:** <https://doi.org/10.5194/bg-2023-43-RC2>



Bastviken, D., Nygren, J., Schenk, J., Parellada Massana, R., and Duc, N. T.: Technical note: Facilitating the use of low-cost methane (CH<sub>4</sub>) sensors in flux chambers – calibration, data processing, and an open-source make-it-yourself logger, *Biogeosciences*, 17, 3659-3667, <https://doi.org/10.5194/bg-17-3659-2020>, 2020.

Duc, N. T., Silverstein, S., Lundmark, L., Reyier, H., Crill, P., and Bastviken, D.: Automated flux chamber for investigating gas flux at water–air interfaces, *Environ. Sci. Technol.*, 47, 968-975, 2013.
